# Supplementary material for: Synthesis and bioimaging of a BODIPY-based fluorescence quenching probe for Fe3+
Source: Royal Society of Chemistry journal article supplement (doi:10.1039/d2ra00818a), 2022-01-01
Supplement: d2ra00818a1.pdf [file d2ra00818a1.pdf]

## Supporting Information

# Synthesis and Bioimaging of a BODIPY-based Fluorescence Quenching Probe for Fe<sup>3+</sup>

Junqiang Leng, Xinyu Lan, Shuang Liu, Wenxuan Jia, Wenshuai Cheng, Jianbo Cheng, Zhenbo  
Liu\*

*School of Chemistry and Chemical Engineering, Yantai University, Yantai 264005, P.R. China*

*\*Corresponding author. Email: zhenboliu@foxmail.com*

## Contents

**Fig. S1.**  $^1\text{H}$  NMR spectrum of **BODIPY-CL**

**Fig. S2.**  $^{13}\text{C}$  NMR spectrum of **BODIPY-CL**

**Fig. S3.** ESI-MS spectrum of **BODIPY-CL**

**Fig. S4.** Effects of pH on the recognition of **BODIPY-CL** (10  $\mu\text{M}$ ) for  $\text{Fe}^{3+}$  (50  $\mu\text{M}$ ) under PBS/acetonitrile (8:2, v/v, pH = 7.4) buffer solution.  $\lambda_{\text{ex}} = 371 \text{ nm}$  The data indicate the fluorescence intensities at 512 nm. Each datum was acquired 10 min after  $\text{Fe}^{3+}$  addition

**Fig. S5.** ESI mass spectrum of **BODIPY-CL** (10  $\mu\text{M}$ ) with  $\text{Fe}^{3+}$  (10 equiv) with positive ion mode in acetonitrile solution

**Fig. S6.** Energy optimized structure for the Probe **BODIPY-CL**

**Fig. S7.** Theoretically obtained UV-visible spectra of the Probe **BODIPY-CL**

**Fig. S8.** Theoretically obtained fluorescence emission spectra of the Probe **BODIPY-CL**

**Table S1.** Energies of the molecular orbitals in eV for the probe **BODIPY-CL**

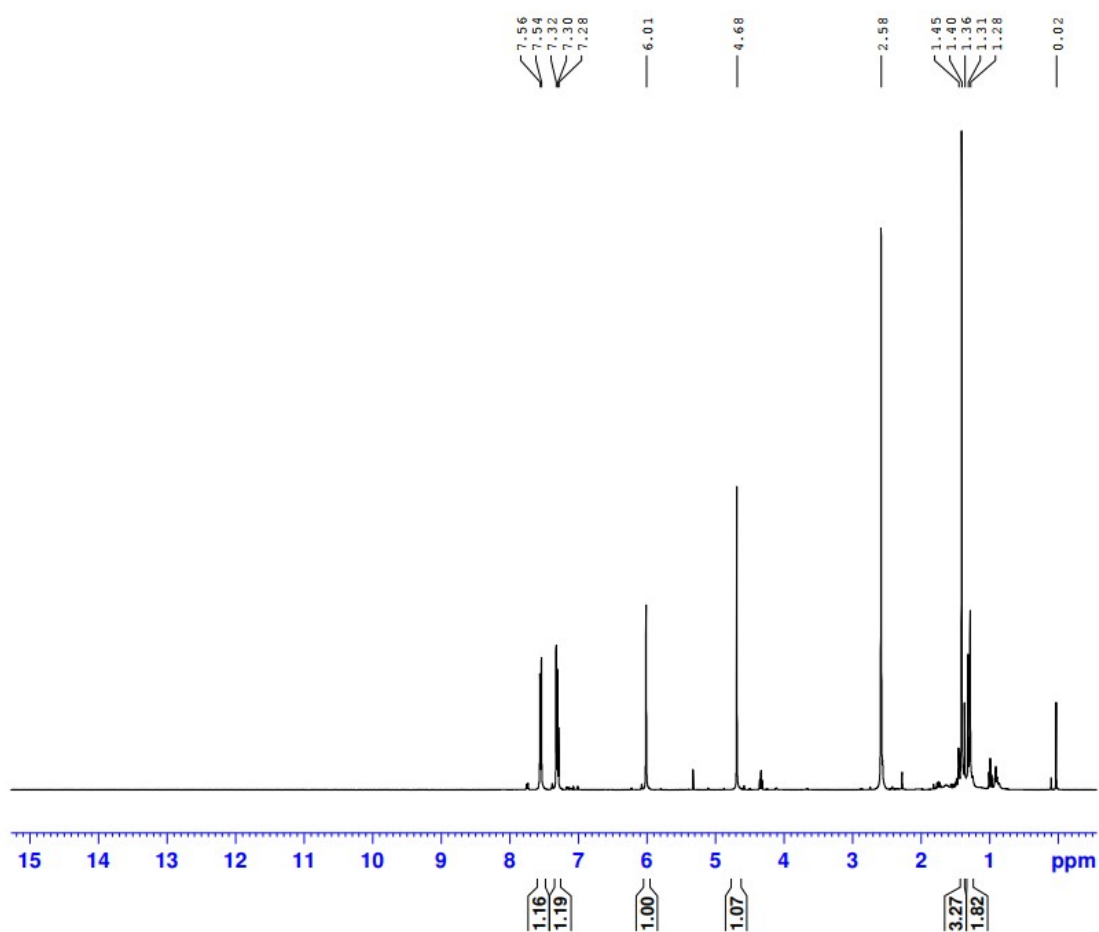

**Fig. S1.**  $^1\text{H}$  NMR spectrum of **BODIPY-CL**.

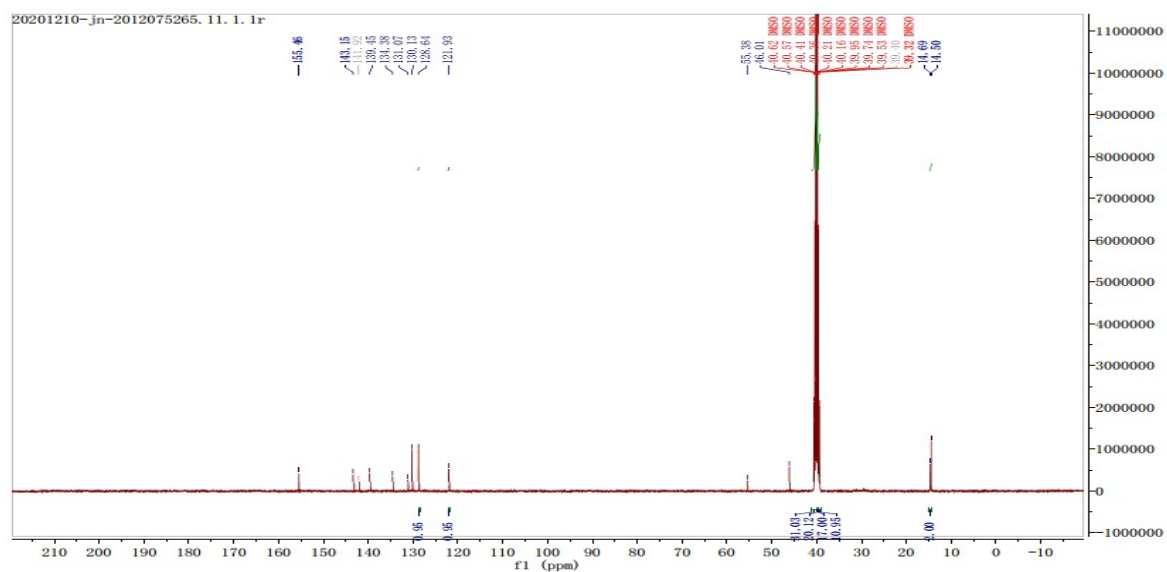

**Fig. S2.**  $^{13}\text{C}$  NMR spectrum of **BODIPY-CL**.

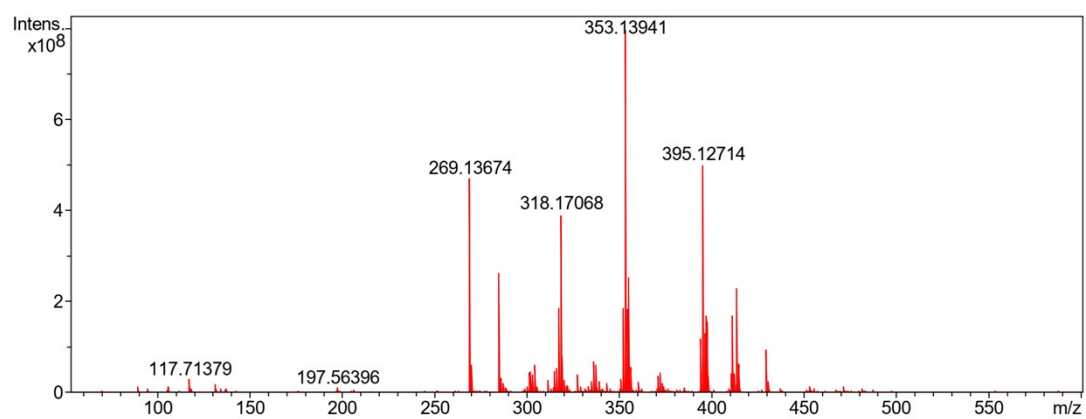

**Fig. S3.** ESI-MS spectrum of **BODIPY-CL**.

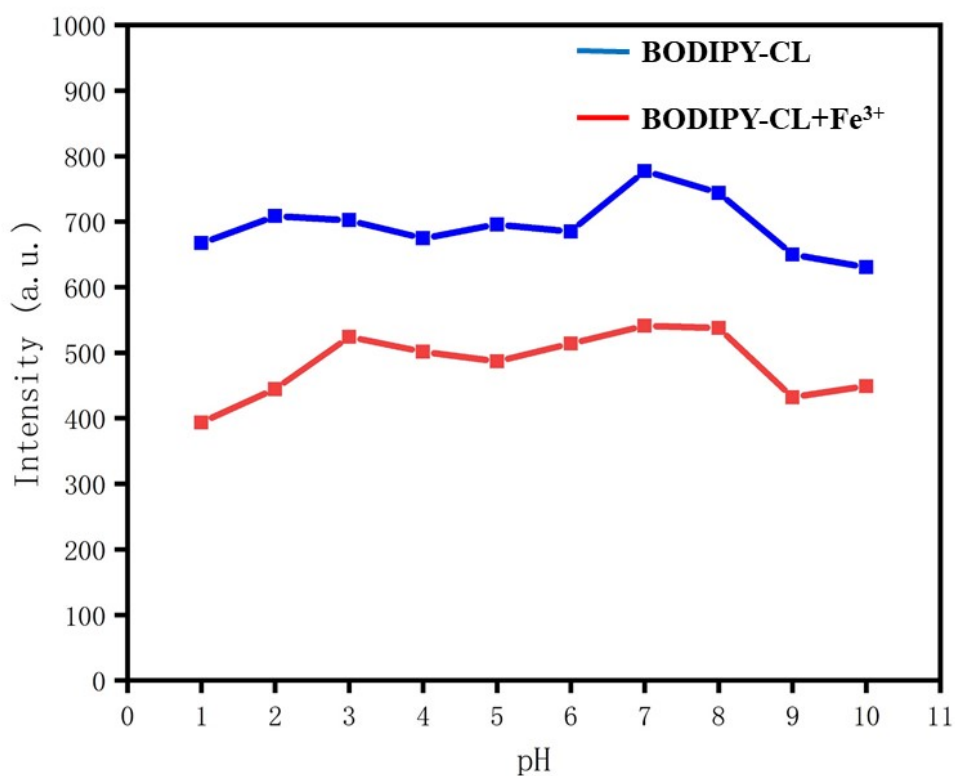

**Fig. S4.** Effects of pH on the recognition of **BODIPY-CL** (10  $\mu$ M) for  $\text{Fe}^{3+}$  (50  $\mu$ M) under PBS/acetonitrile (8:2, v/v, pH = 7.4) buffer solution.  $\lambda_{\text{ex}} = 371$  nm The data indicate the fluorescence intensities at 512 nm. Each datum was acquired 10 min after  $\text{Fe}^{3+}$  addition.

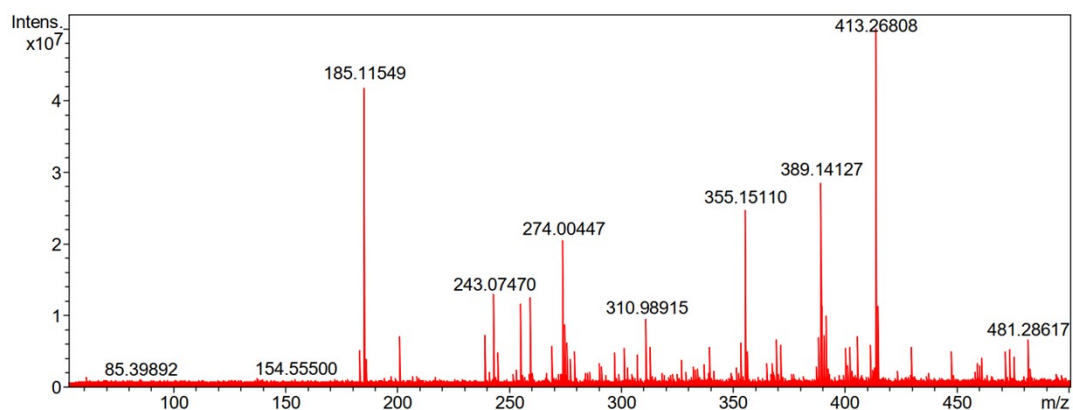

**Fig. S5.** ESI mass spectrum of **BODIPY-CL** (10  $\mu$ M) with  $\text{Fe}^{3+}$  (10 equiv) with positive ion mode in acetonitrile solution.

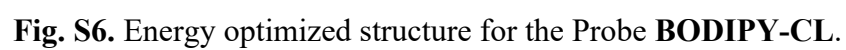

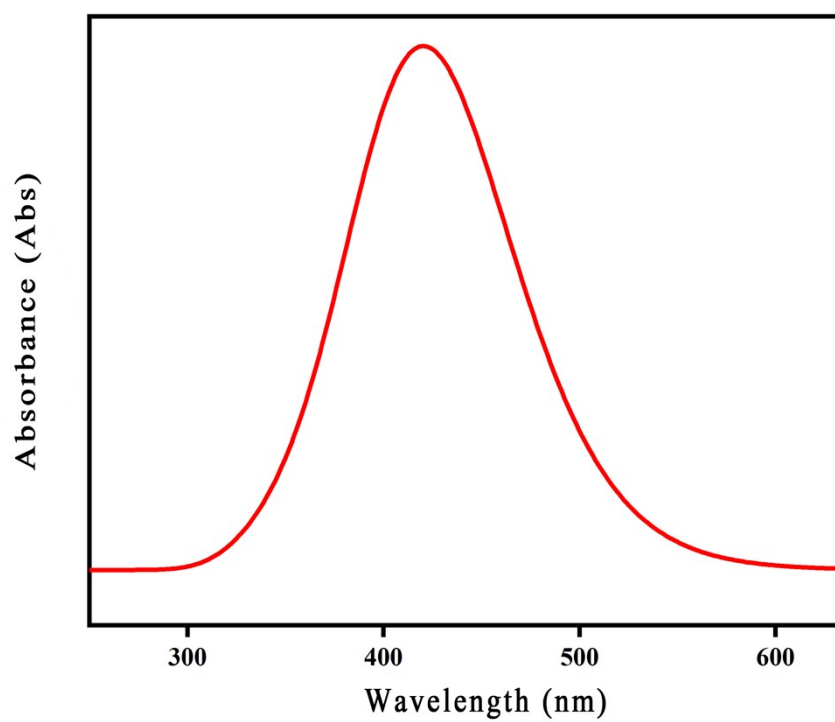

**Fig. S7.** Theoretically obtained UV-visible spectra of the Probe **BODIPY-CL**.

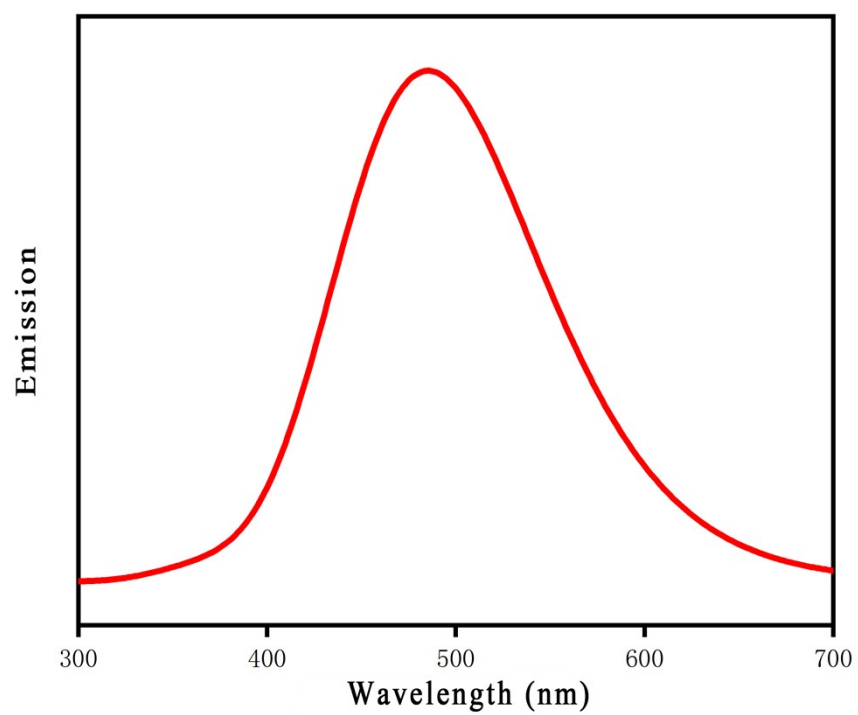

**Fig. S8.** Theoretically obtained fluorescence emission spectra of the Probe **BODIPY-CL**.

**Table S1.** Energies of the molecular orbitals in eV for the probe **BODIPY-CL**.

| <b>Orbitals</b>                     | <b>BODIPY-CL</b> |
|-------------------------------------|------------------|
| HOMO                                | -0.19939         |
| HOMO 1                              | -0.23974         |
| HOMO 2                              | -0.24698         |
| HOMO 3                              | -0.26370         |
| LUMO                                | -0.08941         |
| LUMO 1                              | -0.04418         |
| LUMO 2                              | -0.02531         |
| LUMO 3                              | 0.03095          |
| $E_{\text{LUMO}} - E_{\text{HOMO}}$ | 0.10998          |
